# Supplementary material
Source: Copernicus journal article supplement (doi:10.5194/egusphere-2026-2815)
Supplement: Supplementary file 1 [file egusphere-2026-2815-supplement.pdf]

**Supplementary Table S1: Two-way ANOVA results for Agroecological Zone and Geological Age**

| Term         | df    | sumsq           | meansq         | statistic | p.value | Response |
|--------------|-------|-----------------|----------------|-----------|---------|----------|
| AEZ          | 5     | 5,468.881       | 1,093.776      | 50.416    | <0.001  | P        |
| Geology      | 4     | 827.292         | 206.823        | 9.533     | <0.001  | P        |
| AEZ:Geology  | 16    | 1,624.412       | 101.526        | 4.680     | <0.001  | P        |
| Residuals    | 1,356 | 29,418.207      | 21.695         |           | <0.001  | P        |
| AEZ          | 5     | 73,753,118.885  | 14,750,623.777 | 127.581   | <0.001  | Al_ox    |
| Geology      | 4     | 890,164.386     | 222,541.097    | 1.925     | 0.104   | Al_ox    |
| AEZ: Geology | 16    | 21,571,558.550  | 1,348,222.409  | 11.661    | <0.001  | Al_ox    |
| Residuals    | 1,356 | 156,777,754.293 | 115,617.813    |           |         | Al_ox    |
| AEZ          | 5     | 126,824,316.573 | 25,364,863.315 | 62.615    | <0.001  | Fe_ox    |
| Geology      | 4     | 2,122,255.127   | 530,563.782    | 1.310     | 0.264   | Fe_ox    |
| AEZ: Geology | 16    | 95,789,895.089  | 5,986,868.443  | 14.779    | <0.001  | Fe_ox    |
| Residuals    | 1,356 | 549,305,779.629 | 405,092.758    |           | <0.001  | Fe_ox    |
| AEZ          | 5     | 50.325          | 10.065         | 78.034    | <0.001  | pH       |
| Geology      | 4     | 7.889           | 1.972          | 15.291    | <0.001  | pH       |
| AEZ: Geology | 16    | 14.438          | 0.902          | 6.996     | <0.001  | pH       |
| Residuals    | 1,356 | 174.901         | 0.129          |           |         | pH       |

| Term         | df    | sumsq           | meansq         | statistic | p.value | Response |
|--------------|-------|-----------------|----------------|-----------|---------|----------|
| AEZ          | 5     | 169.197         | 33.839         | 185.507   | <0.001  | SOC      |
| V            | 4     | 8.718           | 2.180          | 11.948    | <0.001  | SOC      |
| AEZ: Geology | 16    | 18.424          | 1.151          | 6.312     | <0.001  | SOC      |
| Residuals    | 1,356 | 247.355         | 0.182          |           |         | SOC      |
| AEZ          | 5     | 22,112.199      | 4,422.440      | 30.436    | <0.001  | Clay     |
| Geology      | 4     | 782.954         | 195.739        | 1.347     | 0.250   | Clay     |
| AEZ: Geology | 16    | 27,410.712      | 1,713.169      | 11.791    | <0.001  | Clay     |
| Residuals    | 1,356 | 197,027.565     | 145.301        |           |         | Clay     |
| AEZ          | 5     | 113,791,358.706 | 22,758,271.741 | 900.560   | <0.001  | Precip   |
| Geology      | 4     | 5,176,505.945   | 1,294,126.486  | 51.209    | <0.001  | Precip   |
| AEZ: Geology | 16    | 11,979,019.373  | 748,688.711    | 29.626    | <0.001  | Precip   |
| Residuals    | 1,356 | 34,267,807.420  | 25,271.244     |           |         | Precip   |
| AEZ          | 5     | 833,383.877     | 166,676.775    | 27.310    | <0.001  | PSI      |
| Geology      | 4     | 6,409.564       | 1,602.391      | 0.263     | 0.902   | PSI      |
| AEZ: Geology | 16    | 1,220,316.497   | 76,269.781     | 12.497    | <0.001  | PSI      |
| Residuals    | 1,356 | 8,275,722.578   | 6,103.040      |           |         | PSI      |
